# Supplementary material for: Are dialects socially learned in marmoset monkeys? Evidence from translocation experiments
Source: PubMed Central journal article supplement (PMC6808547; doi:10.1371/journal.pone.0222486), 2019-10-23
Supplement: pone.0222486.s002.pdf [file pone.0222486.s002.pdf]

## Supplementary Material 2

We tested changes in vocal distance in call structure based on the combination of all call parameters, therefore it is not straightforward to identify which parameter contributed most to the change in vocal distance. We nevertheless provide the average parameter for each individual and each call type before and after the translocation in the supplementary material 2 (Table S2.1 – S2-4) for an overview, but would like to emphasize that it is the combination of all rather than a single parameter that was responsible for the observed results. Changes in any single parameter therefore only have a limited informative value.

**Table E** Average value of each call parameter from the ZH animal in experiment 1 from “Before” and “After1”

|                         | Kapi          |               | Kapo          |               | Tabor         |               | Thilo         |               | Kaliper       |               | Marlene       |               | Vesta         |               | Vito          |               |
|-------------------------|---------------|---------------|---------------|---------------|---------------|---------------|---------------|---------------|---------------|---------------|---------------|---------------|---------------|---------------|---------------|---------------|
|                         | <i>Before</i> | <i>After1</i> | <i>Before</i> | <i>After1</i> | <i>Before</i> | <i>After1</i> | <i>Before</i> | <i>After1</i> | <i>Before</i> | <i>After1</i> | <i>Before</i> | <i>After1</i> | <i>Before</i> | <i>After1</i> | <i>Before</i> | <i>After1</i> |
| sound duration          | 0.472         | 0.522         | 0.446         | 0.599         | 0.583         | 0.565         | 0.498         | 0.508         | 0.517         | 0.579         | 0.645         | 0.735         | 0.415         | 0.383         | 0.776         | 0.451         |
| Mean F0                 | 6733.6        | 5516.2        | 6036.9        | 6068.1        | 6376.5        | 6582.8        | 6631.9        | 6634.3        | 6826.3        | 6450.0        | 6561.4        | 6353.6        | 5979.2        | 5909.6        | 6923.8        | 6055.9        |
| F0 start                | 6198.9        | 4890.4        | 5610.8        | 5357.1        | 5355.1        | 5724.6        | 6019.5        | 6342.7        | 6536.9        | 5916.2        | 5850.3        | 5432.8        | 5632.0        | 5679.6        | 5168.3        | 5507.8        |
| F0 end                  | 7025.2        | 5718.4        | 6086.5        | 6333.3        | 6961.5        | 6925.2        | 7057.1        | 6916.0        | 6877.7        | 6602.8        | 6982.8        | 6784.7        | 6249.9        | 6079.5        | 7712.5        | 6251.2        |
| Max F0                  | 7120.7        | 5908.6        | 6255.0        | 6417.8        | 7101.7        | 7074.8        | 7122.8        | 6939.7        | 7077.3        | 6826.6        | 7037.2        | 6902.8        | 6303.6        | 6186.3        | 7839.0        | 6321.8        |
| % Time Max F0           | 77.1          | 72.9          | 66.7          | 76.3          | 73.9          | 82.1          | 81.4          | 66.1          | 67.4          | 69.3          | 77.7          | 80.3          | 68.2          | 60.1          | 83.0          | 71.3          |
| Min F0                  | 6180.1        | 4869.7        | 5592.0        | 5357.1        | 5292.8        | 5724.6        | 6015.0        | 6231.9        | 6493.0        | 5833.1        | 5842.4        | 5406.9        | 5597.5        | 5613.6        | 5168.3        | 5503.7        |
| F0 abs slope            | 2958.0        | 3073.0        | 2385.0        | 2654.5        | 3957.0        | 3424.8        | 3105.2        | 2392.2        | 2251.0        | 2864.5        | 2470.2        | 2761.0        | 2165.7        | 2301.6        | 4308.5        | 2762.8        |
| Trill calls<br>F0 Var   | 1883.1        | 2150.6        | 1405.3        | 1874.3        | 2821.7        | 2356.0        | 2126.8        | 1431.2        | 1417.1        | 1921.9        | 1656.0        | 2049.2        | 1242.9        | 1318.0        | 3348.4        | 1688.7        |
| Q25%                    | 8017.7        | 7586.3        | 6446.2        | 6746.6        | 6876.4        | 7959.0        | 6488.2        | 6658.3        | 7093.1        | 6747.6        | 6702.5        | 7637.5        | 6290.2        | 8454.0        | 7035.5        | 6623.3        |
| Q50%                    | 10822.4       | 11807.5       | 9977.1        | 10265.0       | 9265.7        | 9630.5        | 7861.4        | 8216.6        | 8756.7        | 8888.5        | 9293.8        | 9123.6        | 9563.2        | 11241.1       | 8137.6        | 9696.6        |
| Q75%                    | 15473.7       | 16793.8       | 12508.1       | 13324.6       | 12657.5       | 12845.7       | 11361.9       | 13216.4       | 12689.6       | 13287.1       | 12841.3       | 12085.5       | 12978.0       | 14749.5       | 11919.1       | 12492.1       |
| Fpeak                   | 200.6         | 229.9         | 214.2         | 204.7         | 219.5         | 222.4         | 174.0         | 158.4         | 229.7         | 215.7         | 203.1         | 211.1         | 203.2         | 198.8         | 338.2         | 217.5         |
| % Time of max intensity | 22.8          | 28.8          | 28.9          | 53.0          | 35.2          | 19.5          | 26.1          | 28.9          | 29.7          | 32.1          | 33.5          | 49.8          | 28.0          | 25.2          | 65.9          | 26.9          |
| jitter                  | 0.019         | 0.021         | 0.023         | 0.027         | 0.019         | 0.023         | 0.023         | 0.016         | 0.021         | 0.018         | 0.024         | 0.020         | 0.023         | 0.023         | 0.015         | 0.020         |
| Fm Rate                 | 2.2           | 1.7           | 2.0           | 2.0           | 1.5           | 2.6           | 2.1           | 2.2           | 2.9           | 2.0           | 1.8           | 1.2           | 2.5           | 2.7           | 0.8           | 2.0           |
| FM extend               | 1355.9        | 1664.3        | 1117.8        | 1223.8        | 2822.0        | 1405.4        | 1432.3        | 727.4         | 744.3         | 1271.9        | 1468.3        | 2287.1        | 949.6         | 601.9         | 4724.1        | 994.0         |

|            |                         |         |         |         |         |         |         |         |         |         |         |         |         |         |         |         |         |
|------------|-------------------------|---------|---------|---------|---------|---------|---------|---------|---------|---------|---------|---------|---------|---------|---------|---------|---------|
| Phee Calls | sound duration          | 1.089   | 0.971   | 0.962   | 1.165   | 0.787   | 0.878   | 1.231   | 1.014   | 1.305   | 1.358   | 1.097   | 1.324   | 1.963   | 1.318   | 1.137   | 1.672   |
|            | Mean F0                 | 7244.2  | 6804.8  | 7747.3  | 7359.7  | 6979.1  | 6977.2  | 7507.5  | 7560.4  | 7856.1  | 7455.8  | 7690.0  | 7546.2  | 7095.3  | 7214.6  | 7957.3  | 7765.0  |
|            | F0 start                | 6518.2  | 5866.6  | 6833.5  | 6276.5  | 6238.7  | 5983.4  | 6623.9  | 6553.1  | 7130.3  | 6634.4  | 6855.1  | 6736.4  | 6511.8  | 6234.8  | 7310.6  | 6765.2  |
|            | F0 end                  | 7627.5  | 7338.1  | 8119.8  | 7806.6  | 6899.9  | 7003.9  | 7592.4  | 7824.8  | 8168.0  | 7742.8  | 8033.1  | 7701.9  | 6719.9  | 7319.5  | 8165.3  | 7862.4  |
|            | Max F0                  | 7858.1  | 7477.6  | 8393.8  | 8058.1  | 7450.3  | 7438.7  | 8116.8  | 8118.4  | 8438.6  | 8061.4  | 8272.5  | 8127.7  | 7430.9  | 7663.0  | 8479.3  | 8116.0  |
|            | % Time Max F0           | 84.0    | 85.2    | 79.4    | 82.9    | 71.6    | 77.3    | 79.4    | 79.8    | 86.6    | 84.7    | 77.2    | 78.3    | 86.6    | 83.8    | 80.5    | 71.3    |
|            | Min F0                  | 6478.8  | 5859.4  | 6754.1  | 6251.2  | 6190.6  | 5979.6  | 6545.7  | 6549.7  | 7127.5  | 6629.2  | 6791.7  | 6731.9  | 6359.1  | 6229.4  | 7115.0  | 6735.8  |
|            | F0 abs slope            | 2146.6  | 2725.5  | 2892.4  | 2719.9  | 3022.1  | 2895.4  | 2200.6  | 2524.8  | 1454.3  | 1505.2  | 2293.4  | 1758.2  | 982.2   | 1767.2  | 1827.9  | 1381.9  |
|            | F0 Var                  | 1691.5  | 2171.6  | 2209.9  | 2123.2  | 2202.5  | 2167.5  | 1734.4  | 1889.0  | 1169.3  | 1212.6  | 1844.2  | 1347.1  | 687.2   | 1391.6  | 1483.2  | 1091.0  |
|            | Q25%                    | 7195.4  | 6816.4  | 7700.6  | 7351.8  | 6976.3  | 7004.5  | 7314.8  | 7408.4  | 7690.7  | 7370.8  | 7479.8  | 7553.1  | 7126.9  | 7287.9  | 7729.7  | 7753.8  |
|            | Q50%                    | 8151.8  | 8358.6  | 8596.7  | 8472.0  | 7557.0  | 7705.0  | 7713.7  | 7794.9  | 7995.7  | 7940.8  | 7856.9  | 8679.3  | 7333.5  | 8097.6  | 8192.1  | 7943.9  |
|            | Q75%                    | 13085.6 | 13276.4 | 12133.5 | 12678.7 | 10402.2 | 11439.4 | 9525.2  | 9399.7  | 9097.2  | 10925.2 | 8482.6  | 13598.8 | 10371.8 | 12785.2 | 10460.8 | 9029.7  |
|            | Fpeak                   | 234.9   | 277.5   | 233.9   | 263.9   | 212.0   | 231.6   | 255.2   | 252.8   | 257.1   | 346.4   | 229.7   | 286.0   | 276.7   | 289.1   | 253.4   | 245.3   |
|            | % Time of max intensity | 46.8    | 48.0    | 48.5    | 47.9    | 48.0    | 48.3    | 39.5    | 41.1    | 46.4    | 46.6    | 47.6    | 50.1    | 52.1    | 58.8    | 32.3    | 53.9    |
| jitter     | 0.007                   | 0.005   | 0.008   | 0.007   | 0.006   | 0.005   | 0.006   | 0.007   | 0.006   | 0.006   | 0.006   | 0.006   | 0.005   | 0.005   | 0.005   | 0.012   | 0.007   |
| Food Call  | sound duration          | 0.099   | 0.107   | 0.144   | 0.152   | 0.114   | 0.106   | 0.101   | 0.101   | 0.117   | 0.120   | 0.238   | 0.229   | 0.121   | 0.120   | 0.112   | 0.115   |
|            | Mean F0                 | 7448.5  | 6527.5  | 8138.7  | 8121.5  | 7301.1  | 6584.5  | 7841.2  | 7382.4  | 7984.1  | 7480.4  | 7942.5  | 6553.5  | 8348.6  | 7999.4  | 7031.2  | 6822.1  |
|            | F0 start                | 8067.1  | 7218.1  | 8895.4  | 8867.7  | 7946.7  | 7185.6  | 8477.5  | 8123.7  | 8663.7  | 8205.0  | 8739.1  | 7440.5  | 9047.2  | 8789.7  | 7628.1  | 7398.0  |
|            | F0 end                  | 6819.3  | 5821.7  | 7067.7  | 7203.0  | 6584.6  | 5843.2  | 7138.2  | 6575.1  | 7314.0  | 6736.3  | 7302.9  | 5894.2  | 7586.1  | 7122.9  | 6417.0  | 6225.8  |
|            | Max F0                  | 8067.1  | 7219.0  | 8903.1  | 8881.2  | 7959.9  | 7200.0  | 8486.0  | 8124.8  | 8664.2  | 8205.0  | 8751.4  | 7446.5  | 9048.2  | 8790.1  | 7628.1  | 7399.3  |
|            | % Time Max F0           | 27.8    | 28.0    | 22.8    | 20.3    | 25.7    | 26.2    | 27.7    | 29.0    | 24.0    | 24.3    | 18.3    | 15.5    | 24.4    | 24.1    | 26.3    | 24.8    |
|            | Min F0                  | 6819.3  | 5821.7  | 7067.7  | 7202.4  | 6580.2  | 5836.8  | 7138.2  | 6574.5  | 7314.0  | 6736.2  | 7297.4  | 5890.0  | 7586.1  | 7122.9  | 6417.0  | 6225.8  |
|            | F0 abs slope            | 34734.7 | 37231.5 | 33278.0 | 28902.9 | 30543.6 | 28568.0 | 43676.9 | 43796.5 | 27748.5 | 29509.3 | 14781.1 | 13924.2 | 33416.2 | 36044.3 | 31096.8 | 25747.0 |
|            | F0 Var                  | 3816.9  | 3777.7  | 6666.6  | 6844.7  | 4866.8  | 5948.4  | 3726.6  | 5064.1  | 5485.9  | 6172.5  | 4451.8  | 6036.7  | 4856.5  | 5109.4  | 3251.4  | 4042.3  |
|            | Q25%                    | 7554.2  | 6809.7  | 7887.3  | 7951.6  | 7525.0  | 7731.8  | 7539.9  | 7239.5  | 7636.1  | 7397.6  | 7831.4  | 6836.6  | 7630.9  | 7783.1  | 6872.5  | 6817.1  |
|            | Q50%                    | 9057.1  | 9160.1  | 9577.3  | 9498.3  | 9773.9  | 10402.1 | 9284.7  | 9100.3  | 8600.0  | 8912.2  | 8919.7  | 9415.2  | 9014.5  | 9292.2  | 8092.1  | 8450.8  |
|            | Q75%                    | 12558.7 | 14194.1 | 13684.2 | 13964.8 | 13884.2 | 13675.0 | 13272.2 | 12366.2 | 11502.0 | 13466.7 | 12746.3 | 13439.9 | 11630.8 | 13982.6 | 11227.0 | 11862.0 |
|            | Fpeak                   | 170.6   | 175.2   | 186.6   | 177.4   | 164.6   | 160.8   | 145.8   | 187.6   | 159.3   | 177.1   | 197.7   | 199.9   | 164.1   | 187.8   | 175.5   | 174.6   |
|            | % Time of max intensity | 41.6    | 44.3    | 44.7    | 41.5    | 46.0    | 48.9    | 44.0    | 44.4    | 41.8    | 43.8    | 36.9    | 36.5    | 48.7    | 44.3    | 43.7    | 45.1    |
| jitter     | 0.032                   | 0.028   | 0.025   | 0.024   | 0.025   | 0.023   | 0.027   | 0.024   | 0.024   | 0.024   | 0.026   | 0.015   | 0.015   | 0.023   | 0.020   | 0.028   | 0.024   |

**Table F** Average value of each call parameter from the ZH animals in experiment 1 from “Before” and “After2”

|             | Kapi                    |               | Kapo          |               | Tabor         |               | Thilo         |               | Kaliper       |               | Marlene       |               | Vesta         |               | Vito          |               |         |
|-------------|-------------------------|---------------|---------------|---------------|---------------|---------------|---------------|---------------|---------------|---------------|---------------|---------------|---------------|---------------|---------------|---------------|---------|
|             | <i>Before</i>           | <i>After2</i> | <i>Before</i> | <i>After2</i> | <i>Before</i> | <i>After2</i> | <i>Before</i> | <i>After2</i> | <i>Before</i> | <i>After2</i> | <i>Before</i> | <i>After2</i> | <i>Before</i> | <i>After2</i> | <i>Before</i> | <i>After2</i> |         |
| Trill calls | sound duration          | 0.472         | 0.477         | 0.446         | 0.387         | 0.583         | 0.570         | 0.498         | 0.468         | 0.517         | 0.501         | 0.645         | 0.596         | 0.415         | 0.344         | 0.776         | 0.360   |
|             | Mean F0                 | 6733.6        | 6149.8        | 6036.9        | 5444.6        | 6376.5        | 5864.6        | 6631.9        | 6542.2        | 6826.3        | 6439.8        | 6561.4        | 6161.5        | 5979.2        | 6013.9        | 6923.8        | 6101.2  |
|             | F0 start                | 6198.9        | 5670.1        | 5610.8        | 5196.0        | 5355.1        | 4809.7        | 6019.5        | 5906.2        | 6536.9        | 6177.0        | 5850.3        | 5502.3        | 5632.0        | 5904.1        | 5168.3        | 5736.5  |
|             | F0 end                  | 7025.2        | 6270.3        | 6086.5        | 5384.6        | 6961.5        | 6417.5        | 7057.1        | 6941.5        | 6877.7        | 6456.3        | 6982.8        | 6472.6        | 6249.9        | 6145.6        | 7712.5        | 6192.5  |
|             | Max F0                  | 7120.7        | 6437.5        | 6255.0        | 5587.1        | 7101.7        | 6459.4        | 7122.8        | 6978.1        | 7077.3        | 6630.1        | 7037.2        | 6566.1        | 6303.6        | 6221.9        | 7839.0        | 6284.5  |
|             | % Time Max F0           | 77.1          | 67.1          | 66.7          | 57.2          | 73.9          | 78.6          | 81.4          | 79.7          | 67.4          | 54.5          | 77.7          | 78.2          | 68.2          | 64.0          | 83.0          | 68.9    |
|             | Min F0                  | 6180.1        | 5630.2        | 5592.0        | 5148.9        | 5292.8        | 4809.7        | 6015.0        | 5904.8        | 6493.0        | 6112.3        | 5842.4        | 5493.7        | 5597.5        | 5847.3        | 5168.3        | 5732.3  |
|             | F0 abs slope            | 2958.0        | 2651.3        | 2385.0        | 2190.1        | 3957.0        | 3550.2        | 3105.2        | 3150.6        | 2251.0        | 1904.0        | 2470.2        | 2387.1        | 2165.7        | 1943.4        | 4308.5        | 2322.7  |
|             | F0 Var                  | 1883.1        | 1585.7        | 1405.3        | 1187.6        | 2821.7        | 2669.2        | 2126.8        | 2081.4        | 1417.1        | 1191.4        | 1656.0        | 1643.9        | 1242.9        | 895.0         | 3348.4        | 1365.1  |
|             | Q25%                    | 8017.7        | 7940.5        | 6446.2        | 6564.9        | 6876.4        | 6642.8        | 6488.2        | 6471.7        | 7093.1        | 6454.5        | 6702.5        | 7159.8        | 6290.2        | 8032.8        | 7035.5        | 6885.2  |
|             | Q50%                    | 10822.4       | 11494.8       | 9977.1        | 9669.0        | 9265.7        | 9606.7        | 7861.4        | 8229.4        | 8756.7        | 8679.4        | 9293.8        | 9987.3        | 9563.2        | 11160.6       | 8137.6        | 9966.6  |
|             | Q75%                    | 15473.7       | 14959.2       | 12508.1       | 12075.6       | 12657.5       | 12252.4       | 11361.9       | 11779.1       | 12689.6       | 11935.7       | 12841.3       | 12271.3       | 12978.0       | 14502.4       | 11919.1       | 13274.6 |
|             | Fpeak                   | 200.6         | 219.5         | 214.2         | 174.8         | 219.5         | 205.0         | 174.0         | 266.7         | 229.7         | 200.1         | 203.1         | 224.4         | 203.2         | 201.7         | 338.2         | 180.6   |
|             | % Time of max intensity | 22.8          | 24.4          | 28.9          | 30.9          | 35.2          | 25.7          | 26.1          | 22.2          | 29.7          | 29.3          | 33.5          | 33.1          | 28.0          | 27.5          | 65.9          | 24.9    |
|             | jitter                  | 0.019         | 0.022         | 0.023         | 0.028         | 0.019         | 0.025         | 0.023         | 0.019         | 0.021         | 0.024         | 0.024         | 0.022         | 0.023         | 0.024         | 0.015         | 0.024   |
| Fm Rate     | 2.2                     | 2.4           | 2.0           | 2.3           | 1.5           | 1.8           | 2.1           | 1.7           | 2.9           | 2.5           | 1.8           | 1.6           | 2.5           | 2.8           | 0.8           | 2.2           |         |
| FM extend   | 1355.9                  | 1113.7        | 1117.8        | 728.5         | 2822.0        | 2196.4        | 1432.3        | 1621.2        | 744.3         | 613.8         | 1468.3        | 1579.8        | 949.6         | 444.9         | 4724.1        | 1030.8        |         |
| Phee Calls  | sound duration          | 1.089         | 1.040         | 0.962         | 1.172         | 0.787         | 1.044         | 1.231         | 0.949         | 1.305         | 1.374         | 1.097         | 1.469         | 1.963         | 1.442         | 1.137         | 1.546   |
|             | Mean F0                 | 7244.2        | 6809.9        | 7747.3        | 7399.6        | 6979.1        | 6789.1        | 7507.5        | 7506.5        | 7856.1        | 6950.7        | 7690.0        | 7767.3        | 7095.3        | 7409.1        | 7957.3        | 8053.2  |
|             | F0 start                | 6518.2        | 6138.4        | 6833.5        | 6381.8        | 6238.7        | 5952.1        | 6623.9        | 6491.3        | 7130.3        | 6368.5        | 6855.1        | 7179.0        | 6511.8        | 6897.1        | 7310.6        | 7055.6  |
|             | F0 end                  | 7627.5        | 7504.7        | 8119.8        | 7789.5        | 6899.9        | 6885.4        | 7592.4        | 8086.8        | 8168.0        | 7240.1        | 8033.1        | 7906.7        | 6719.9        | 7798.6        | 8165.3        | 8046.6  |
|             | Max F0                  | 7858.1        | 7590.6        | 8393.8        | 8053.4        | 7450.3        | 7241.8        | 8116.8        | 8231.6        | 8438.6        | 7342.0        | 8272.5        | 8240.5        | 7430.9        | 8091.5        | 8479.3        | 8591.8  |
|             | % Time Max F0           | 84.0          | 85.0          | 79.4          | 81.4          | 71.6          | 80.2          | 79.4          | 83.7          | 86.6          | 87.2          | 77.2          | 76.8          | 86.6          | 76.1          | 80.5          | 87.4    |

|           |                         |         |         |         |         |         |         |         |         |         |         |         |         |         |         |         |         |       |
|-----------|-------------------------|---------|---------|---------|---------|---------|---------|---------|---------|---------|---------|---------|---------|---------|---------|---------|---------|-------|
|           | Min F0                  | 6478.8  | 6101.8  | 6754.1  | 6381.1  | 6190.6  | 5931.6  | 6545.7  | 6491.3  | 7127.5  | 6368.5  | 6791.7  | 7075.8  | 6359.1  | 6608.4  | 7115.0  | 6984.6  |       |
|           | F0 abs slope            | 2146.6  | 2132.1  | 2892.4  | 2327.1  | 3022.1  | 2180.8  | 2200.6  | 2529.9  | 1454.3  | 993.7   | 2293.4  | 1299.3  | 982.2   | 1683.2  | 1827.9  | 1751.9  |       |
|           | F0 Var                  | 1691.5  | 1606.4  | 2209.9  | 1769.0  | 2202.5  | 1601.2  | 1734.4  | 2003.3  | 1169.3  | 792.0   | 1844.2  | 1083.1  | 687.2   | 1375.0  | 1483.2  | 1314.2  |       |
|           | Q25%                    | 7195.4  | 6710.8  | 7700.6  | 7339.8  | 6976.3  | 7003.5  | 7314.8  | 7265.5  | 7690.7  | 6921.2  | 7479.8  | 7731.5  | 7126.9  | 7301.1  | 7729.7  | 7937.6  |       |
|           | Q50%                    | 8151.8  | 9044.4  | 8596.7  | 8157.2  | 7557.0  | 7904.7  | 7713.7  | 7854.3  | 7995.7  | 8650.4  | 7856.9  | 8267.6  | 7333.5  | 7700.8  | 8192.1  | 8258.5  |       |
|           | Q75%                    | 13085.6 | 13160.3 | 12133.5 | 12002.0 | 10402.2 | 12576.1 | 9525.2  | 10367.2 | 9097.2  | 12579.2 | 8482.6  | 12761.4 | 10371.8 | 11399.9 | 10460.8 | 9501.8  |       |
|           | Fpeak                   | 234.9   | 306.3   | 233.9   | 256.5   | 212.0   | 258.5   | 255.2   | 242.3   | 257.1   | 215.0   | 229.7   | 317.4   | 276.7   | 268.4   | 253.4   | 235.7   |       |
|           | % Time of max intensity | 46.8    | 44.0    | 48.5    | 48.9    | 48.0    | 58.6    | 39.5    | 39.8    | 46.4    | 45.7    | 47.6    | 46.9    | 52.1    | 48.4    | 32.3    | 49.5    |       |
|           | jitter                  | 0.007   | 0.005   | 0.008   | 0.006   | 0.006   | 0.006   | 0.006   | 0.009   | 0.006   | 0.005   | 0.006   | 0.005   | 0.005   | 0.008   | 0.012   | 0.007   |       |
|           | sound duration          | 0.099   | 0.106   | 0.144   | 0.150   | 0.114   | 0.101   | 0.101   | 0.101   | 0.117   | 0.136   | 0.238   | 0.195   | 0.121   | 0.114   | 0.112   | 0.107   |       |
|           | Mean F0                 | 7448.5  | 7100.7  | 8138.7  | 8041.1  | 7301.1  | 6748.1  | 7841.2  | 7743.0  | 7984.1  | 8557.2  | 7942.5  | 7407.6  | 8348.6  | 7826.1  | 7031.2  | 7009.6  |       |
|           | F0 start                | 8067.1  | 7708.7  | 8895.4  | 8907.8  | 7946.7  | 7423.4  | 8477.5  | 8548.4  | 8663.7  | 9430.6  | 8739.1  | 8019.8  | 9047.2  | 8436.2  | 7628.1  | 7601.2  |       |
|           | F0 end                  | 6819.3  | 6442.6  | 7067.7  | 7001.9  | 6584.6  | 5895.4  | 7138.2  | 6860.2  | 7314.0  | 7547.3  | 7302.9  | 6930.1  | 7586.1  | 7135.7  | 6417.0  | 6365.3  |       |
|           | Max F0                  | 8067.1  | 7708.7  | 8903.1  | 8916.6  | 7959.9  | 7436.1  | 8486.0  | 8549.3  | 8664.2  | 9434.1  | 8751.4  | 8031.1  | 9048.2  | 8447.0  | 7628.1  | 7622.7  |       |
|           | % Time Max F0           | 27.8    | 27.7    | 22.8    | 25.4    | 25.7    | 23.7    | 27.7    | 28.7    | 24.0    | 24.8    | 18.3    | 19.4    | 24.4    | 24.5    | 26.3    | 25.2    |       |
| Food Call | Min F0                  | 6819.3  | 6442.6  | 7067.7  | 7001.9  | 6580.2  | 5895.4  | 7138.2  | 6859.6  | 7314.0  | 7547.3  | 7297.4  | 6929.1  | 7586.1  | 7135.7  | 6417.0  | 6345.6  |       |
|           | F0 abs slope            | 34734.7 | 37533.0 | 33278.0 | 37110.2 | 30543.6 | 30958.6 | 43676.9 | 47140.1 | 27748.5 | 34204.0 | 14781.1 | 12508.3 | 33416.2 | 27700.1 | 31096.8 | 27553.7 |       |
|           | F0 Var                  | 3816.9  | 3158.2  | 6666.6  | 4575.7  | 4866.8  | 8319.9  | 3726.6  | 4628.1  | 5485.9  | 6633.9  | 4451.8  | 4783.3  | 4856.5  | 5133.3  | 3251.4  | 5280.4  |       |
|           | Q25%                    | 7554.2  | 7212.9  | 7887.3  | 8186.2  | 7525.0  | 7847.3  | 7539.9  | 7524.2  | 7636.1  | 8376.6  | 7831.4  | 7228.6  | 7630.9  | 7211.7  | 6872.5  | 6959.1  |       |
|           | Q50%                    | 9057.1  | 9619.1  | 9577.3  | 10062.3 | 9773.9  | 10495.8 | 9284.7  | 9022.0  | 8600.0  | 9601.0  | 8919.7  | 7992.2  | 9014.5  | 8607.5  | 8092.1  | 8499.8  |       |
|           | Q75%                    | 12558.7 | 13933.2 | 13684.2 | 15714.6 | 13884.2 | 14320.3 | 13272.2 | 12336.6 | 11502.0 | 12165.4 | 12746.3 | 11253.0 | 11630.8 | 11347.2 | 11227.0 | 12851.8 |       |
|           | Fpeak                   | 170.6   | 165.3   | 186.6   | 172.8   | 164.6   | 165.0   | 145.8   | 176.5   | 159.3   | 160.0   | 197.7   | 186.3   | 164.1   | 153.1   | 175.5   | 191.7   |       |
|           | % Time of max intensity | 41.6    | 45.8    | 44.7    | 40.2    | 46.0    | 48.5    | 44.0    | 44.2    | 41.8    | 38.7    | 36.9    | 39.2    | 48.7    | 51.8    | 43.7    | 47.5    |       |
|           |                         | jitter  | 0.032   | 0.027   | 0.025   | 0.022   | 0.025   | 0.020   | 0.027   | 0.023   | 0.024   | 0.025   | 0.015   | 0.017   | 0.023   | 0.035   | 0.028   | 0.022 |

**Table G** Average value of each call parameter from the MA animals in experiment 1 from “*Before*” and “*NewPhys*”.

|                |                         | Conan         |                | Craken        |                | Washington    |                | Wisconsin     |                |
|----------------|-------------------------|---------------|----------------|---------------|----------------|---------------|----------------|---------------|----------------|
|                |                         | <i>Before</i> | <i>NewPhys</i> | <i>Before</i> | <i>NewPhys</i> | <i>Before</i> | <i>NewPhys</i> | <i>Before</i> | <i>NewPhys</i> |
| Trill<br>calls | sound duration          | 0.274         | 0.334          | 0.398         | 0.647          | 0.272         | 0.419          | 0.214         | 0.364          |
|                | Mean F0                 | 7291.6        | 8362.9         | 7684.3        | 8556.6         | 7321.6        | 7063.3         | 7846.9        | 7414.4         |
|                | F0 start                | 7337.4        | 8259.7         | 7784.6        | 7883.0         | 7448.7        | 6921.6         | 7905.5        | 7203.8         |
|                | F0 end                  | 7090.6        | 8427.4         | 7499.4        | 8554.0         | 7218.5        | 7075.5         | 7708.4        | 7430.1         |
|                | Max F0                  | 7433.1        | 8484.5         | 7944.6        | 8919.5         | 7542.4        | 7176.6         | 8001.1        | 7530.7         |
|                | % Time Max F0           | 25.5          | 70.1           | 30.5          | 72.2           | 25.6          | 54.0           | 33.1          | 52.2           |
|                | Min F0                  | 7090.6        | 8208.9         | 7381.6        | 7738.7         | 7142.6        | 6894.5         | 7668.5        | 7180.8         |
|                | F0 abs slope            | 2511.1        | 1642.8         | 2806.3        | 3257.0         | 2194.3        | 1780.9         | 2585.2        | 2283.8         |
|                | F0 Var                  | 1441.6        | 945.6          | 1640.0        | 2104.5         | 1568.5        | 849.2          | 1664.6        | 1111.6         |
|                | Q25%                    | 7339.3        | 8279.3         | 7664.0        | 8116.9         | 7296.6        | 6932.6         | 7770.0        | 7230.1         |
|                | Q50%                    | 7785.3        | 9206.0         | 8149.4        | 9190.3         | 7681.2        | 7663.7         | 8244.9        | 7938.1         |
|                | Q75%                    | 13205.8       | 18796.1        | 12568.3       | 16116.0        | 9051.9        | 13086.0        | 9795.7        | 13019.9        |
|                | Fpeak                   | 213.0         | 227.9          | 206.5         | 297.0          | 193.3         | 202.9          | 169.9         | 198.5          |
|                | % Time of max intensity | 40.1          | 24.3           | 28.1          | 45.8           | 25.7          | 22.5           | 33.1          | 23.8           |
|                | jitter                  | 0.030         | 0.040          | 0.034         | 0.043          | 0.025         | 0.043          | 0.026         | 0.043          |
| Fm Rate        | 2.6                     | 3.7           | 3.0            | 3.4           | 3.8            | 3.4           | 3.5            | 2.7           |                |
| FM extend      | 580.5                   | 406.1         | 652.2          | 1094.8        | 470.8          | 287.9         | 638.4          | 519.7         |                |
| Phee<br>calls  | sound duration          | 0.422         | 0.703          | 0.447         | 0.987          | 0.539         | 0.800          | 0.532         | 0.839          |
|                | Mean F0                 | 7697.6        | 8111.2         | 7680.6        | 8313.3         | 7161.8        | 7417.3         | 7528.9        | 7692.3         |
|                | F0 start                | 7557.4        | 7571.8         | 7502.7        | 7554.5         | 6936.8        | 6886.9         | 7309.4        | 7197.1         |
|                | F0 end                  | 7667.3        | 8338.8         | 7635.9        | 8563.0         | 7138.1        | 7704.8         | 7590.5        | 7996.0         |
|                | Max F0                  | 7923.2        | 8412.0         | 7973.5        | 8749.5         | 7415.9        | 7803.0         | 7775.5        | 8082.4         |
|                | % Time Max F0           | 54.7          | 75.0           | 37.5          | 72.5           | 60.9          | 79.9           | 66.9          | 79.6           |
|                | Min F0                  | 7358.9        | 7548.5         | 7248.5        | 7514.8         | 6813.9        | 6866.3         | 7231.7        | 7181.2         |
|                | F0 abs slope            | 2319.4        | 1680.3         | 2720.1        | 1966.7         | 2073.9        | 2315.3         | 1789.8        | 2098.0         |
|                | F0 Var                  | 1726.2        | 1337.3         | 1836.2        | 1489.8         | 1707.9        | 1408.8         | 1476.2        | 1447.5         |

|       |                         |         |         |         |         |        |        |         |         |
|-------|-------------------------|---------|---------|---------|---------|--------|--------|---------|---------|
|       | Q25%                    | 7699.6  | 7932.2  | 7560.5  | 8001.7  | 7044.7 | 7174.2 | 7396.2  | 7503.3  |
|       | Q50%                    | 8080.9  | 8290.3  | 8373.5  | 8585.8  | 7263.1 | 7455.5 | 7633.5  | 7849.5  |
|       | Q75%                    | 12431.5 | 10284.2 | 12309.1 | 11570.2 | 8183.9 | 8530.1 | 9562.5  | 10562.4 |
|       | Fpeak                   | 205.5   | 219.7   | 225.3   | 242.3   | 210.1  | 239.1  | 219.1   | 227.3   |
|       | % Time of max intensity | 35.5    | 42.9    | 37.5    | 33.4    | 41.6   | 27.6   | 44.5    | 36.9    |
|       | jitter                  | 0.029   | 0.016   | 0.028   | 0.025   | 0.011  | 0.019  | 0.019   | 0.021   |
|       | sound duration          | 0.064   | 0.090   | 0.078   | 0.093   |        |        | 0.084   | 0.101   |
|       | Mean F0                 | 7892.3  | 8259.3  | 7543.4  | 7263.6  |        |        | 7623.8  | 7994.9  |
|       | F0 start                | 8239.8  | 8574.1  | 7905.2  | 7639.9  |        |        | 8037.4  | 8388.4  |
|       | F0 end                  | 7471.5  | 7914.4  | 7122.8  | 6860.8  |        |        | 7211.5  | 7592.3  |
|       | Max F0                  | 8281.6  | 8576.9  | 7975.7  | 7648.4  |        |        | 8050.8  | 8388.9  |
|       | % Time Max F0           | 21.7    | 27.1    | 23.8    | 24.6    |        |        | 20.0    | 29.6    |
|       | Min F0                  | 7435.6  | 7914.4  | 7118.1  | 6860.8  |        |        | 7206.4  | 7592.3  |
| Food  | F0 abs slope            | 25835.3 | 23996.9 | 19278.0 | 31121.8 |        |        | 17044.9 | 27056.9 |
| calls | F0 Var                  | 8636.1  | 1595.3  | 8047.0  | 1183.5  |        |        | 7333.6  | 1263.7  |
|       | Q25%                    | 7406.3  | 7356.7  | 7332.2  | 7349.6  |        |        | 7294.0  | 7290.3  |
|       | Q50%                    | 8221.8  | 8209.2  | 7953.1  | 8882.0  |        |        | 8100.4  | 8294.2  |
|       | Q75%                    | 9762.2  | 9537.9  | 10549.3 | 14215.8 |        |        | 11086.8 | 11320.9 |
|       | Fpeak                   | 161.9   | 165.9   | 146.0   | 163.0   |        |        | 153.0   | 163.9   |
|       | % Time of max intensity | 50.6    | 47.6    | 47.0    | 43.6    |        |        | 48.0    | 44.7    |
|       | jitter                  | 0.030   | 0.049   | 0.035   | 0.053   |        |        | 0.030   | 0.041   |

**Table H** Average value of each call parameter for each MA individual in the situation “Before” and “NewSoc” as well as of the ZH animals (Baseline) involved in experiment 2.

|             |                            | Conan         |               | Craken        |               | Washington    |               | Wisconsin     |               | Lilly           | Gatto           | Mibba           | Nautilus        |
|-------------|----------------------------|---------------|---------------|---------------|---------------|---------------|---------------|---------------|---------------|-----------------|-----------------|-----------------|-----------------|
|             |                            | <i>Before</i> | <i>NewSoc</i> | <i>Before</i> | <i>NewSoc</i> | <i>Before</i> | <i>NewSoc</i> | <i>Before</i> | <i>NewSoc</i> | <i>Baseline</i> | <i>Baseline</i> | <i>Baseline</i> | <i>Baseline</i> |
| Trill calls | sound duration             | 0.274         | 0.634         | 0.398         | 0.738         | 0.272         | 0.516         | 0.214         | 0.502         | 0.570           | 0.369           | 0.702           | 0.808           |
|             | Mean F0                    | 7291.6        | 7254.5        | 7684.3        | 7273.1        | 7321.6        | 7010.8        | 7846.9        | 7355.6        | 6609.6          | 6684.0          | 6652.1          | 7042.3          |
|             | F0 start                   | 7337.4        | 6704.6        | 7784.6        | 6399.2        | 7448.7        | 6607.6        | 7905.5        | 6901.5        | 6191.9          | 6439.6          | 5956.3          | 6320.6          |
|             | F0 end                     | 7090.6        | 7296.5        | 7499.4        | 7567.4        | 7218.5        | 7120.6        | 7708.4        | 7439.2        | 6688.2          | 6769.2          | 6812.9          | 7393.1          |
|             | Max F0                     | 7433.1        | 7564.9        | 7944.6        | 7697.1        | 7542.4        | 7217.1        | 8001.1        | 7553.6        | 6957.9          | 6836.4          | 7090.9          | 7555.6          |
|             | Perc Time Max F0           | 25.5          | 63.0          | 30.5          | 74.9          | 25.6          | 69.2          | 33.1          | 65.3          | 62.2            | 64.3            | 65.9            | 74.8            |
|             | Min F0                     | 7090.6        | 6647.6        | 7381.6        | 6393.9        | 7142.6        | 6603.7        | 7668.5        | 6886.9        | 6086.9          | 6432.9          | 5826.7          | 6284.5          |
|             | F0 abs slope               | 2511.1        | 2639.1        | 2806.3        | 2394.3        | 2194.3        | 1989.7        | 2585.2        | 2342.2        | 2831.2          | 2052.6          | 2629.1          | 2471.9          |
|             | F0 Var                     | 1441.6        | 1625.9        | 1640.0        | 1776.7        | 1568.5        | 1212.4        | 1664.6        | 1395.5        | 1688.8          | 1114.4          | 1961.8          | 1666.5          |
|             | Q25perc                    | 7339.3        | 7077.8        | 7664.0        | 6977.1        | 7296.6        | 6821.8        | 7770.0        | 7093.7        | 8148.4          | 6731.1          | 6787.9          | 7123.6          |
|             | Q50perc                    | 7785.3        | 7797.6        | 8149.4        | 7583.1        | 7681.2        | 7455.9        | 8244.9        | 7579.8        | 9878.8          | 8633.1          | 9234.4          | 8072.6          |
|             | Q75perc                    | 13205.8       | 10030.5       | 12568.3       | 9888.1        | 9051.9        | 10284.9       | 9795.7        | 9482.6        | 12738.7         | 13279.8         | 13103.2         | 12240.7         |
|             | Fpeak                      | 213.0         | 201.6         | 206.5         | 191.4         | 193.3         | 186.1         | 169.9         | 186.9         | 235.9           | 210.3           | 236.1           | 220.9           |
|             | Perc Time of max intensity | 40.1          | 26.3          | 28.1          | 30.0          | 25.7          | 23.1          | 33.1          | 22.2          | 33.3            | 26.9            | 24.7            | 54.4            |
|             | jitter                     | 0.030         | 0.030         | 0.034         | 0.027         | 0.025         | 0.040         | 0.026         | 0.037         | 0.026           | 0.023           | 0.016           | 0.022           |
|             | Fm Rate                    | 2.6           | 2.8           | 3.0           | 2.6           | 3.8           | 2.9           | 3.5           | 2.7           | 2.8             | 2.9             | 1.7             | 1.9             |
| FM extend   | 580.5                      | 1026.5        | 652.2         | 1119.0        | 470.8         | 610.3         | 638.4         | 721.5         | 1244.1        | 525.3           | 1843.6          | 1855.9          |                 |
| Phee calls  | sound duration             | 0.422         | 0.725         | 0.447         | 1.378         | 0.539         | 1.502         | 0.532         | 1.182         | 0.863           | 0.757           | 0.955           | 0.927           |
|             | Mean F0                    | 7697.6        | 8006.5        | 7680.6        | 7660.0        | 7161.8        | 7464.9        | 7528.9        | 7344.7        | 7141.2          | 7296.1          | 7692.7          | 7512.6          |
|             | F0 start                   | 7557.4        | 7422.0        | 7502.7        | 6864.4        | 6936.8        | 6585.0        | 7309.4        | 6627.7        | 6348.5          | 6609.7          | 6699.9          | 6625.7          |
|             | F0 end                     | 7667.3        | 8165.3        | 7635.9        | 7777.7        | 7138.1        | 7859.9        | 7590.5        | 7619.1        | 7614.9          | 7226.1          | 8047.1          | 7793.5          |
|             | Max F0                     | 7923.2        | 8300.8        | 7973.5        | 8065.5        | 7415.9        | 8024.8        | 7775.5        | 7872.2        | 7715.2          | 7656.6          | 8358.7          | 8224.8          |
|             | percTime Max F0            | 54.7          | 74.8          | 37.5          | 74.9          | 60.9          | 85.1          | 66.9          | 78.9          | 81.5            | 64.5            | 82.0            | 79.8            |
|             | Min F0                     | 7358.9        | 7391.8        | 7248.5        | 6817.4        | 6813.9        | 6571.9        | 7231.7        | 6604.9        | 6316.7          | 6572.9          | 6673.8          | 6576.4          |

|            |                           |         |         |         |         |         |         |         |         |         |         |         |         |
|------------|---------------------------|---------|---------|---------|---------|---------|---------|---------|---------|---------|---------|---------|---------|
|            | F0 abs slope              | 2319.4  | 1847.3  | 2720.1  | 1612.6  | 2073.9  | 1422.6  | 1789.8  | 1943.4  | 2240.0  | 2580.2  | 2503.8  | 3049.4  |
|            | F0 Var                    | 1726.2  | 1432.9  | 1836.2  | 1284.5  | 1707.9  | 1161.3  | 1476.2  | 1543.2  | 1807.5  | 2018.8  | 2012.2  | 2204.6  |
|            | Q25perc                   | 7699.6  | 7826.0  | 7560.5  | 7471.7  | 7044.7  | 7218.2  | 7396.2  | 7094.9  | 7187.4  | 7176.9  | 7582.9  | 7363.4  |
|            | Q50perc                   | 8080.9  | 8179.0  | 8373.5  | 7785.7  | 7263.1  | 7465.5  | 7633.5  | 7386.1  | 8079.7  | 7436.9  | 8285.8  | 7725.3  |
|            | Q75perc                   | 12431.5 | 9817.2  | 12309.1 | 9009.0  | 8183.9  | 7906.2  | 9562.5  | 8298.8  | 12734.9 | 7912.3  | 11777.0 | 9214.9  |
|            | Fpeak                     | 205.5   | 188.1   | 225.3   | 214.6   | 210.1   | 218.4   | 219.1   | 215.4   | 224.7   | 218.5   | 231.1   | 253.2   |
|            | percTime of max intensity | 35.5    | 43.9    | 37.5    | 49.5    | 41.6    | 40.7    | 44.5    | 40.2    | 58.9    | 46.8    | 53.4    | 51.5    |
|            | jitter                    | 0.029   | 0.018   | 0.028   | 0.014   | 0.011   | 0.011   | 0.019   | 0.012   | 0.004   | 0.005   | 0.007   | 0.007   |
|            | sound duration            | 0.064   | 0.115   | 0.078   | 0.132   | 0.084   | 0.141   | 0.084   | 0.143   | 0.156   | 0.105   | 0.122   | 0.135   |
|            | Mean F0                   | 7892.3  | 8484.7  | 7543.4  | 7783.6  | 7830.2  | 9300.1  | 7623.8  | 7860.0  | 7947.8  | 7549.6  | 7955.0  | 6785.4  |
|            | F0 start                  | 8239.8  | 8894.7  | 7905.2  | 8221.4  | 8157.1  | 9973.1  | 8037.4  | 8375.3  | 8791.3  | 7989.7  | 8519.9  | 7603.9  |
|            | F0 end                    | 7471.5  | 7814.5  | 7122.8  | 7144.2  | 7502.7  | 8355.4  | 7211.5  | 7274.8  | 6770.2  | 7045.9  | 7227.1  | 5798.9  |
|            | Max F0                    | 8281.6  | 8969.2  | 7975.7  | 8287.1  | 8164.7  | 9990.9  | 8050.8  | 8396.3  | 8853.4  | 8002.4  | 8542.4  | 7616.5  |
|            | percTime Max F0           | 21.7    | 28.3    | 23.8    | 25.8    | 19.8    | 23.8    | 20.0    | 22.0    | 21.3    | 24.4    | 21.4    | 23.3    |
|            | Min F0                    | 7435.6  | 7798.4  | 7118.1  | 7133.4  | 7499.6  | 8355.4  | 7206.4  | 7264.7  | 6764.4  | 7041.9  | 7222.3  | 5798.9  |
| Food Calls | F0 abs slope              | 25835.3 | 26740.0 | 19278.0 | 22176.7 | 11980.1 | 28653.7 | 17044.9 | 20804.3 | 30917.6 | 26234.2 | 25412.5 | 36039.0 |
|            | F0 Var                    | 8636.1  | 4804.7  | 8047.0  | 4422.5  | 6319.8  | 6115.8  | 7333.6  | 4172.0  | 9012.8  | 3988.3  | 6376.6  | 5804.9  |
|            | Q25perc                   | 7406.3  | 8252.5  | 7332.2  | 7531.6  | 7485.0  | 8544.7  | 7294.0  | 7530.3  | 8161.5  | 7445.0  | 7803.0  | 6977.1  |
|            | Q50perc                   | 8221.8  | 9237.8  | 7953.1  | 8430.4  | 8094.5  | 9502.0  | 8100.4  | 8677.6  | 10155.3 | 8569.0  | 9449.9  | 9113.9  |
|            | Q75perc                   | 9762.2  | 11469.7 | 10549.3 | 10405.1 | 9573.3  | 11227.9 | 11086.8 | 11027.2 | 14319.6 | 11181.6 | 13796.3 | 12628.6 |
|            | Fpeak                     | 161.9   | 152.2   | 146.0   | 147.4   | 156.9   | 158.4   | 153.0   | 154.2   | 175.7   | 171.2   | 164.8   | 179.1   |
|            | percTime of max intensity | 50.6    | 46.9    | 47.0    | 43.2    | 47.5    | 47.8    | 48.0    | 40.3    | 40.3    | 43.1    | 45.2    | 44.2    |
|            | jitter                    | 0.030   | 0.026   | 0.035   | 0.026   | 0.020   | 0.023   | 0.030   | 0.027   | 0.019   | 0.024   | 0.023   | 0.034   |
